# Supplementary material for: Electrochemistry of rechargeable aqueous zinc/zinc-sulphate/manganese-oxide batteries and methods for preparation of high-performance cathodes
Source: Royal Society of Chemistry journal article supplement (doi:10.1039/d2ta03729g), 2022-01-01
Supplement: d2ta03729g1.pdf [file d2ta03729g1.pdf]

Supporting information

**Electrochemistry of rechargeable aqueous zinc/zinc-sulphate/manganese-oxide batteries and methods for preparation of high-performance cathodes**

Wei Gong,<sup>\*a</sup> Bunshi Fugetsu,<sup>\*b</sup> Wei Mao,<sup>a</sup> Adavan Kiliyankil Vipin,<sup>a</sup> Ichiro Sakata,<sup>ab</sup> Lei Su,<sup>c</sup>  
Xueji Zhang<sup>c</sup> and Morinobu Endo<sup>d</sup>

<sup>a</sup> School of Engineering, The University of Tokyo, Bunkyo-ku, Tokyo, 113-0032, Japan.

E-mail: gong@ipr-ctr.t.u-tokyo.ac.jp

<sup>b</sup> Institute for Future Initiatives, The University of Tokyo, Bunkyo-ku, Tokyo, 113-0032, Japan.

E-mail: bunshifugetsu@g.ecc.u-tokyo.ac.jp

<sup>c</sup> School of Biomedical Engineering, Health Science Center, Shenzhen University, Shenzhen, 518037, PR China.

<sup>d</sup> Institute of Carbon Science and Technology, Shinshu University, 4-17-1 Wakasato, Nagano, 380-8553, Japan.

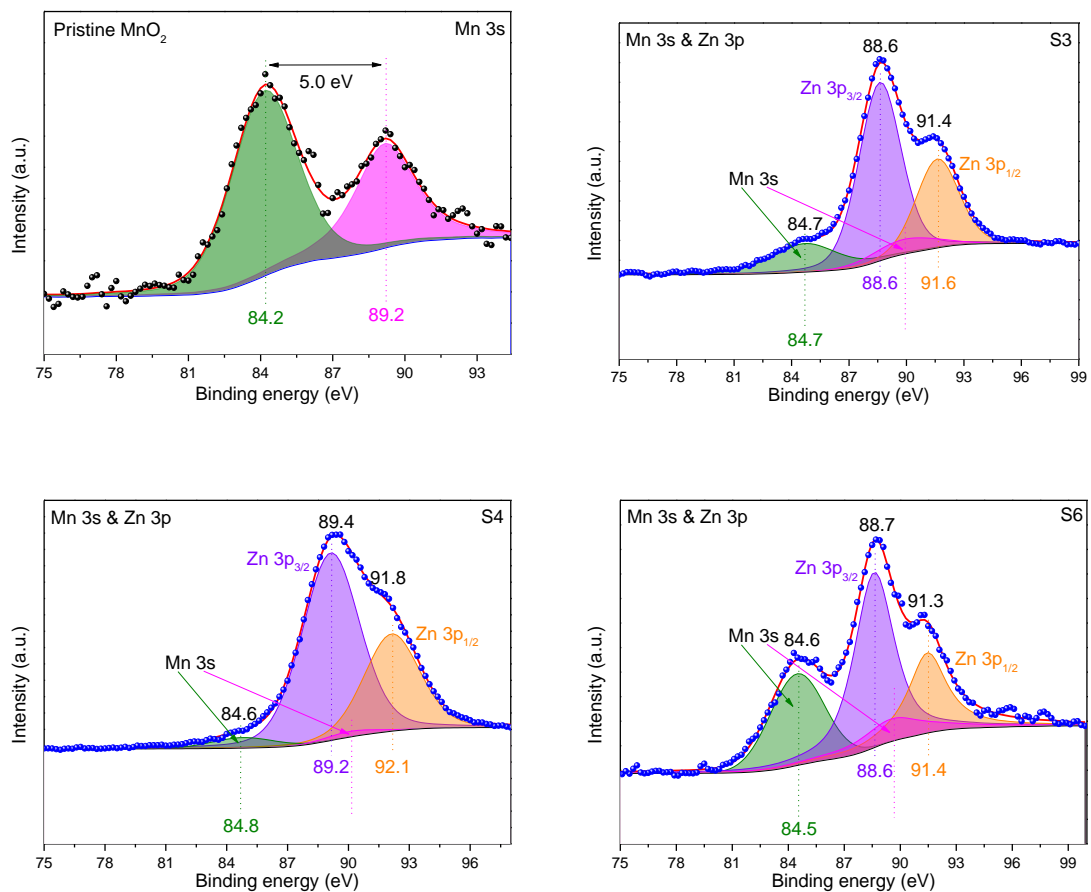

**Figure S1.** X-ray photoelectron spectroscopy of the MnO<sub>2</sub>-based cathode. XPS spectra of Mn 3s in the MnO<sub>2</sub>-based cathode at different states.

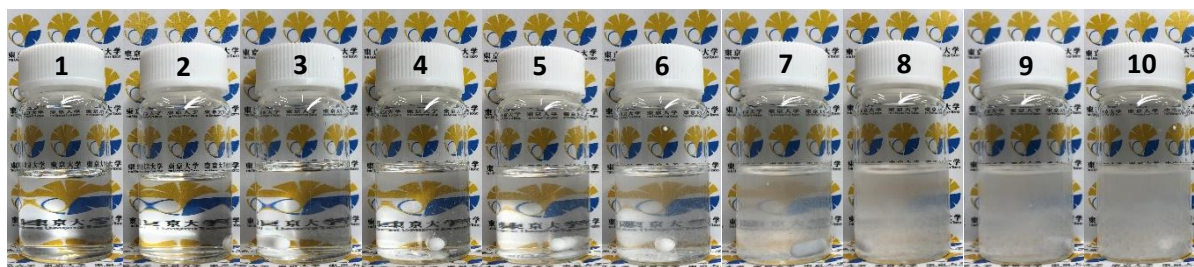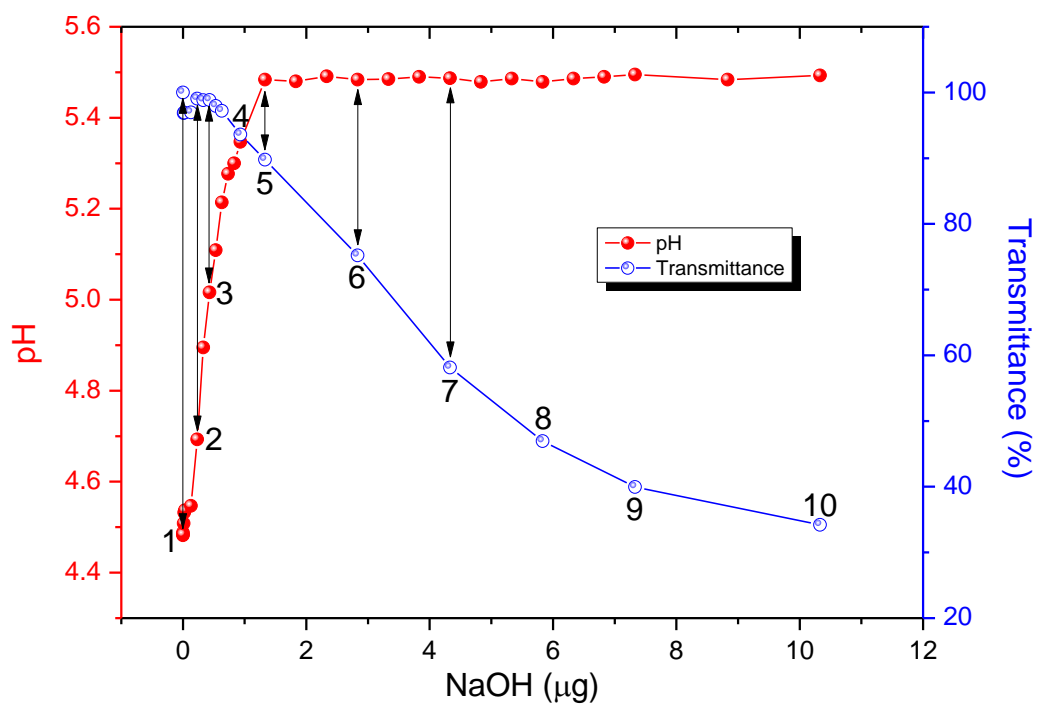

**Figure S2.** Changes of pH (red colour, measured using a pH meter) and transmittance (blue colour, measured at 600 nm) of the electrolyte while adding NaOH.

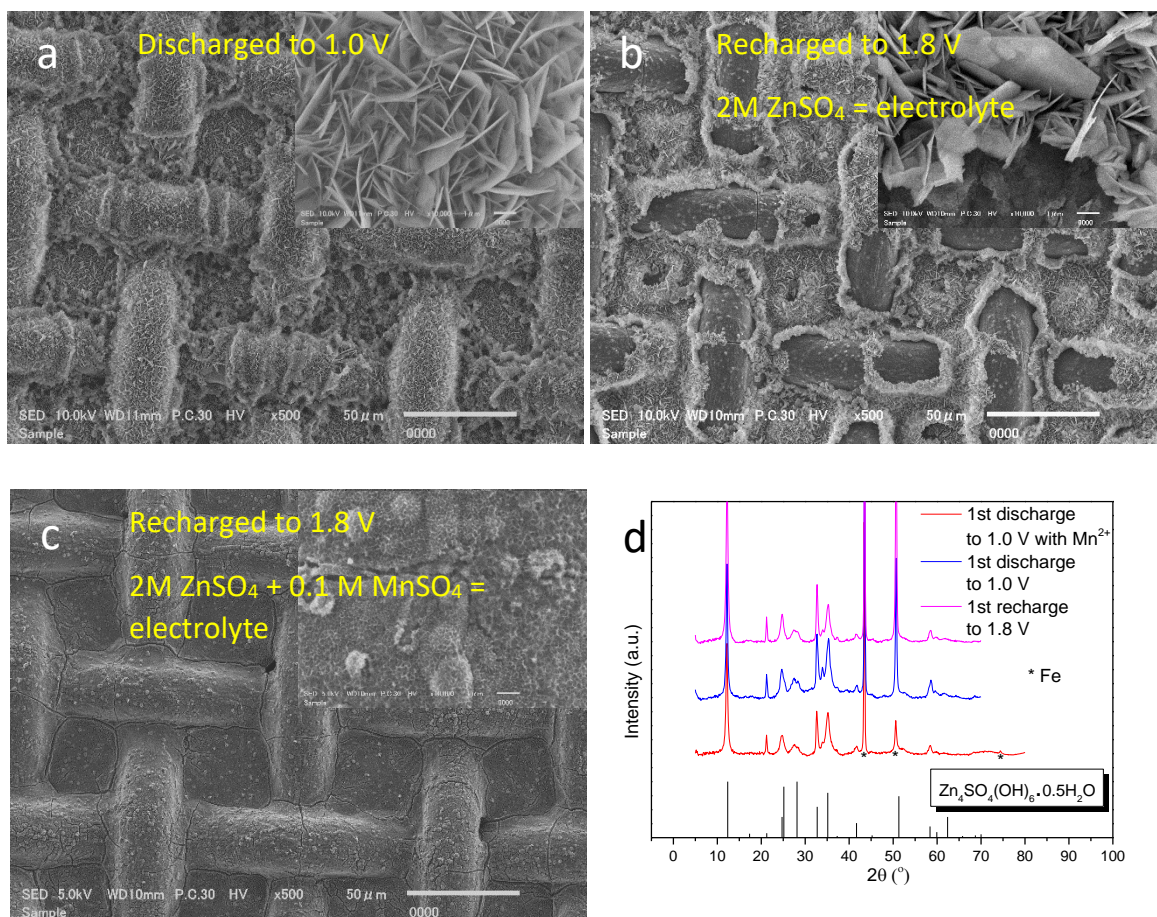

**Figure S3.** Electrolyte with and without MnSO<sub>4</sub>. (a,b) SEM images of MnO<sub>2</sub> cathode after discharge (a) and recharge (b) in 2 M ZnSO<sub>4</sub> electrolyte without containing MnSO<sub>4</sub>. (c) SEM images of the MnO<sub>2</sub>-based cathode after recharged to 1.8 V with 2 M ZnSO<sub>4</sub> + 0.1 M MnSO<sub>4</sub> as electrolyte. The insets of (a-c) show the corresponding highly magnified SEM, respectively. (d) XRD of the MnO<sub>2</sub>-based cathode at three stages of discharge and recharge: 1<sup>st</sup> discharged to 1.0 V with 2 M ZnSO<sub>4</sub> + 0.1 M MnSO<sub>4</sub> as electrolyte (red), 1<sup>st</sup> discharged to 1.0 V with 2 M ZnSO<sub>4</sub> as electrolyte (blue), and 1<sup>st</sup> recharged to 1.8 V with 2 M ZnSO<sub>4</sub> as electrolyte (pink), respectively. In case of the full discharge, zinc sulphate hydroxide (ZSH) was identified unconditionally, however, in case of the full recharge, ZSH was identified only when the electrolyte without MnSO<sub>4</sub> was used.

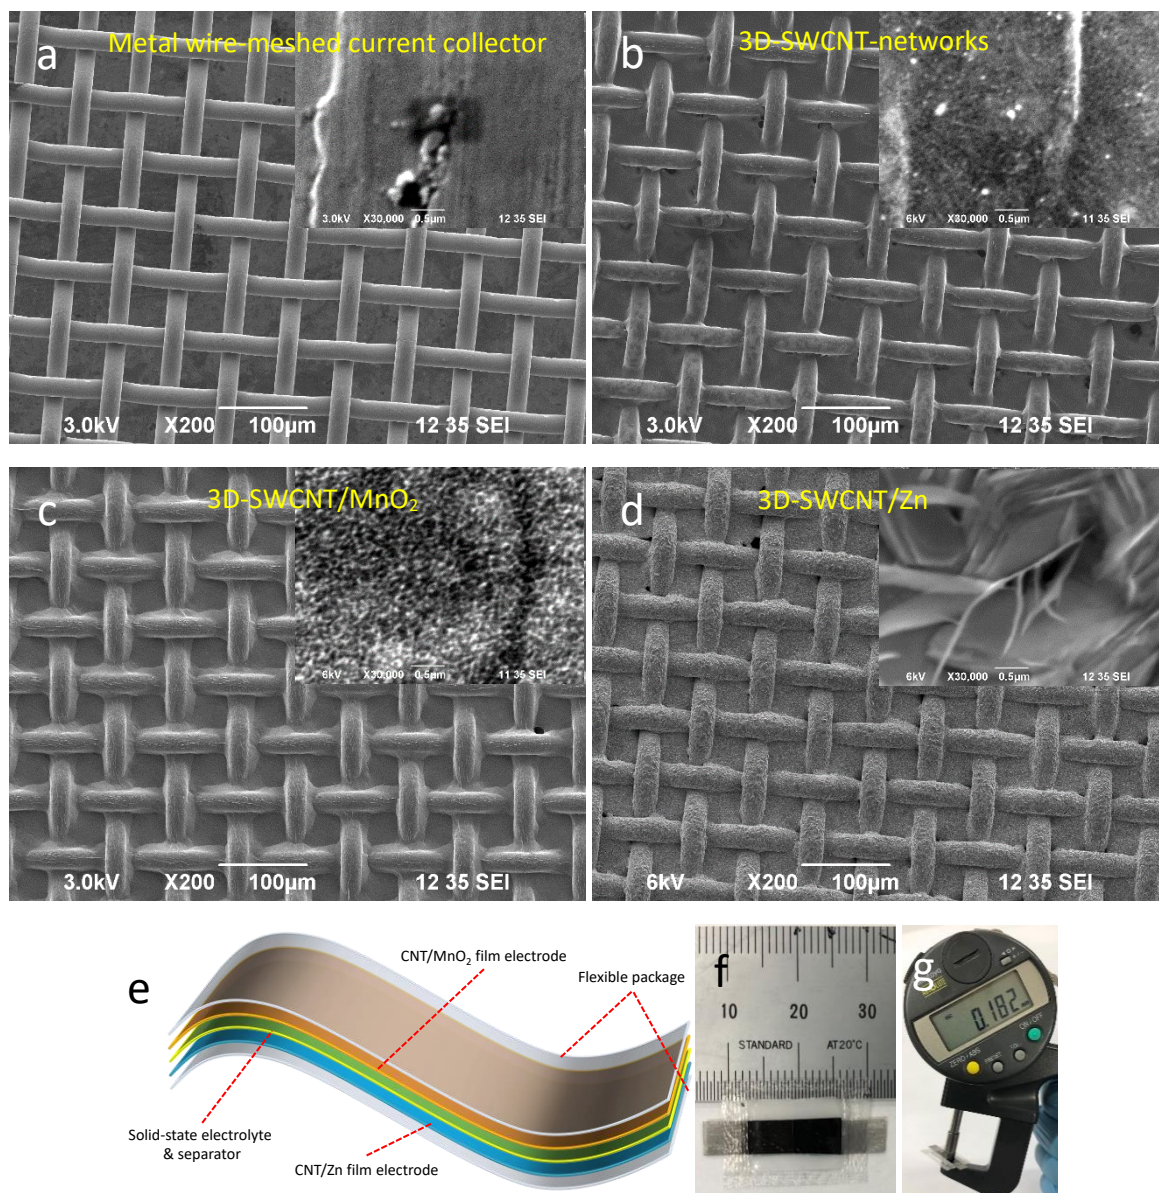

**Figure S4.** Structural and morphological characterization of 3D-SWCNT/MnO<sub>2</sub> and 3D-SWCNT/Zn based electrodes and the packed cell. (a,b,c,d) SEM images of the wire-meshed current collectors (a), 3D-SWCNT-networks on the wire-meshed current collectors (b), 3D-SWCNT/MnO<sub>2</sub> on the wire-meshed current collectors (c), and 3D-SWCNT/Zn on the wire-meshed current collectors (d). The insets of (a-d) show the corresponding highly magnified SEM, respectively. (e) Schematic illustration of a flexible 3D-SWCNT/Zn/3D-SWCNT/MnO<sub>2</sub> cell. (f,g) Photographs of the size of the Zn/MnO<sub>2</sub> battery device.

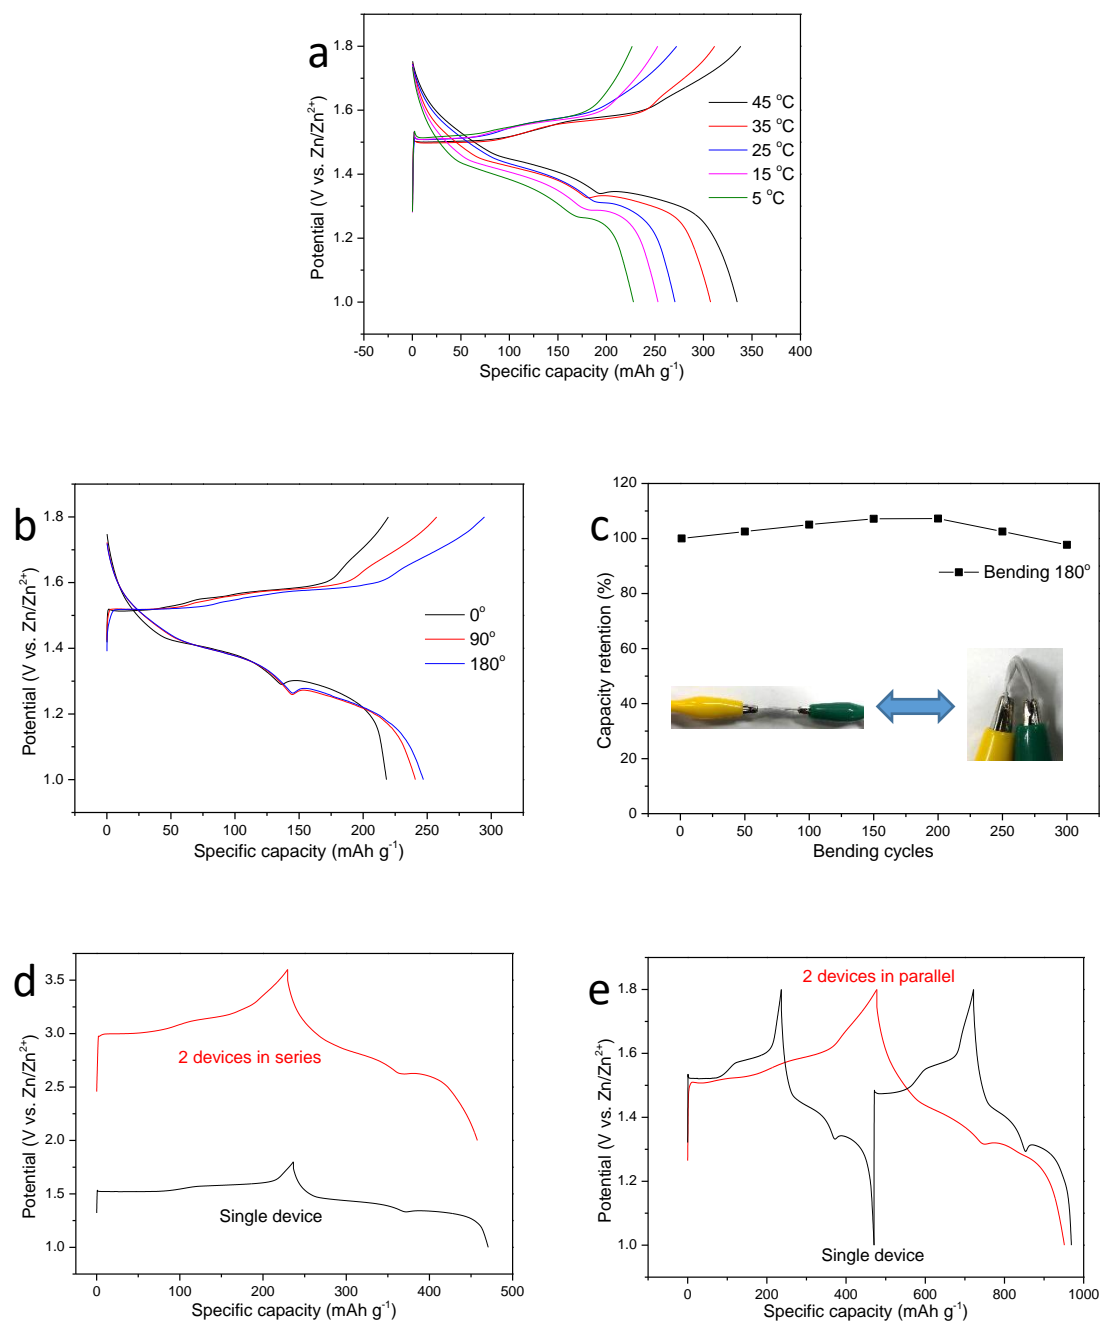

**Figure S5.** Electrochemical performance of Zn/ZnSO<sub>4</sub>-MnSO<sub>4</sub>/MnO<sub>2</sub> cells. (a) Galvanostatic discharge-recharge curves under different environmental temperatures (5 °C ~ 45 °C). (b) GCD curves with different bending angles (0°, 90°, 180°). (c) Capacity retention after 300 bending cycles from 0° to 180° bending angle; the inserted photos show non-bent and after bending (180° bending degree) of the model cell used in the bending cycle evaluation. (d,e) GCD curves of a single cell and two cells being linked in series (d) and in parallel (e).

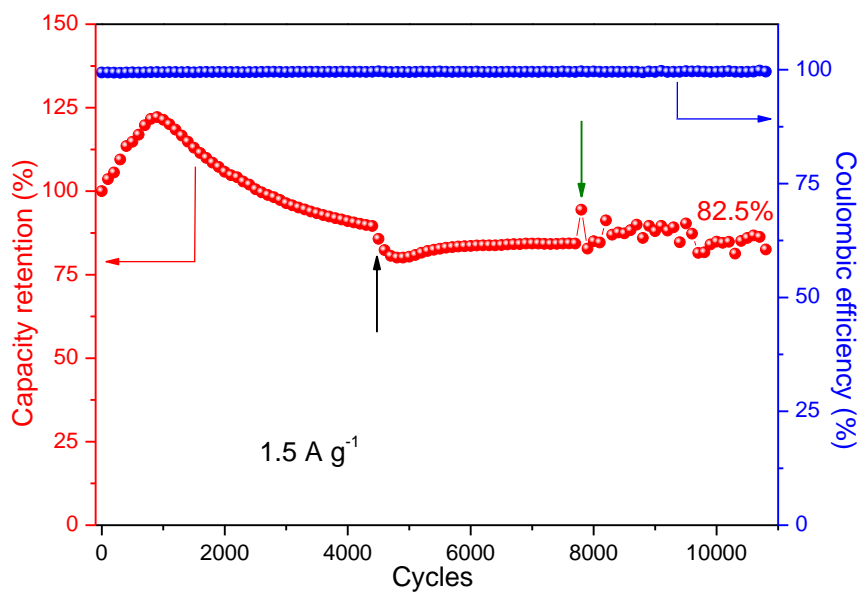

**Figure S6.** Long-term cyclic performance tests of a CR2032 coin cell based Zn/ ZnSO<sub>4</sub>-MnSO<sub>4</sub>/MnO<sub>2</sub> single cell. The cell was being discharged/recharged for 11000 cycles. The cell was paced in a constant 25 °C oven and continuously ran for 4800 cycles. After the running being stopped for two days (pointed by a black arrow), the cell ran continuously to 8000 cycles. The cell was paced under ambient conditions (without control of temperatures, pointed by a green arrow) and then continuously ran for another 3000 cycles. Capacity retention was 82.5% after 11000 cycles. Discharge/recharge rate: 1.5 A g<sup>-1</sup>.
